# Supplementary material
Source: Springer Nature journal article supplement (https://www.springermedizin.de/resource/supplementary/12891_2009_727_MOESM2_ESM.pdf/9506274)

Motor  
Relearning

Transition

Graded  
Activity

Aerobic  
Exercise

Week 1

Week 2

Week 3

Week 4

Week 5

Week 6

Week 7

Week 8

Week 9

Week 10

Week 11

Week 12

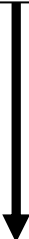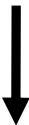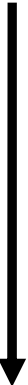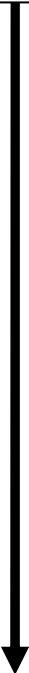

Supplement: MOESM2 [file 9506274]
